# Supplementary material for: Trace metal distributions in the transition zone from the Greenland Ice Sheet to the surface water in Kangerlussuaq fjord (67° N)
Source: Copernicus journal article supplement (doi:10.5194/tc-19-3107-2025), 2025-08-18
Supplement: Supplementary file 1 [file tc-19-3107-2025-supplement.pdf]

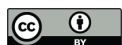

*Supplement of*

## **Trace metal distributions in the transition zone from the Greenland Ice Sheet to the surface water in Kangerlussuaq fjord (67° N)**

**Clara R. Vives et al.**

*Correspondence to:* Clara R. Vives ([clara.vives@sund.ku.dk](mailto:clara.vives@sund.ku.dk))

The copyright of individual parts of the supplement might differ from the article licence.

Table S1. Instrument uncertainties, measured as the Reference Standard, RSD, (%) from all trace metal samples ( $\mu\text{g L}^{-1}$ ); iron (Fe), manganese (Mn), cobalt (Co), copper (Cu), zinc (Zn), nickel (Ni), molybdenum (Mo), arsenic (As), vanadium (V), and uranium (U). RSD is not reported for values below quantification limit. Quantification limit for each element is given in the second row for each element.

| Station | 56 Fe [ He ]        |       | 55 Mn [ He ]        |       | 59 Co [ He ]        |       | 66 Zn [ He ]        |       | 60 Ni [ He ]        |       | 95 Mo [ He ]        |       | 75 As [ He ]        |       | 51 V [ He ]         |       | 238 U [ No Gas ]    |      |
|---------|---------------------|-------|---------------------|-------|---------------------|-------|---------------------|-------|---------------------|-------|---------------------|-------|---------------------|-------|---------------------|-------|---------------------|------|
|         | 5 $\mu\text{g/l}$   | %     | 0.5 $\mu\text{g/l}$ | %     | 0.1 $\mu\text{g/l}$ | %     | 1 $\mu\text{g/l}$   | %     | 0.1 $\mu\text{g/l}$ | %     | 0.1 $\mu\text{g/l}$ | %     | 0.5 $\mu\text{g/l}$ | %     | 0.5 $\mu\text{g/l}$ | %     | 0.1 $\mu\text{g/l}$ | %    |
|         | [ $\mu\text{g/l}$ ] | RSD   | [ $\mu\text{g/l}$ ] | RSD  |
| 6       | 5.11                | 8.93  | 7.75                | 6.26  | 0.10                | 5.21  | 2.20                | 17.05 | 0.84                | 5.56  | 1.00                | 4.00  | <QL                 |       | <QL                 |       | 0.12                | 3.98 |
| 6       | <QL                 |       | 2.36                | 4.41  | <QL                 |       | 1.16                | 11.88 | 0.66                | 8.72  | 4.67                | 6.87  | 0.68                | 14.25 | <QL                 |       | 1.01                | 1.79 |
| 7       | <QL                 |       | 3.89                | 6.95  | <QL                 |       | 9.66                | 6.97  | 0.73                | 14.35 | 3.26                | 2.46  | 0.53                | 27.35 | <QL                 |       | 0.68                | 1.77 |
| 7       | <QL                 |       | 3.62                | 2.88  | <QL                 |       | 8.92                | 8.52  | 0.82                | 3.49  | 3.34                | 5.45  | 0.51                | 16.96 | <QL                 |       | 0.62                | 1.55 |
| 8       | 17.54               | 1.91  | 5.97                | 1.42  | 0.11                | 4.88  | 93.97               | 1.61  | 0.76                | 14.56 | 1.51                | 6.96  | <QL                 |       | 0.51                | 7.52  | 0.25                | 2.70 |
| 9       | <QL                 |       | 4.96                | 1.65  | <QL                 |       | 18.58               | 4.60  | 0.69                | 18.39 | 2.01                | 6.11  | <QL                 |       | <QL                 |       | 0.46                | 1.96 |
| 10      | <QL                 |       | 4.28                | 2.74  | <QL                 |       | 14.78               | 3.76  | 0.80                | 14.94 | 2.91                | 4.86  | <QL                 |       | <QL                 |       | 0.64                | 1.54 |
| 11      | <QL                 |       | 3.89                | 16.13 | <QL                 |       | 7.29                | 9.59  | 0.71                | 6.39  | 3.26                | 7.06  | <QL                 |       | <QL                 |       | 0.53                | 3.48 |
| 13      | 16.08               | 3.39  | 8.06                | 1.56  | 0.12                | 7.19  | 52.95               | 5.39  | 0.62                | 3.34  | 0.57                | 4.88  | <QL                 |       | 0.65                | 28.62 | <QL                 |      |
| 14      | 40.93               | 9.66  | 9.87                | 10.18 | 0.16                | 13.51 | 35.17               | 13.65 | 0.78                | 14.48 | 0.37                | 5.11  | <QL                 |       | 0.60                | 6.48  | <QL                 |      |
| 15      | 75.20               | 3.47  | 12.47               | 5.59  | 0.16                | 9.69  | 18.68               | 4.34  | 0.84                | 10.20 | 0.22                | 19.68 | <QL                 |       | 0.68                | 1.52  | <QL                 |      |
| 16      | 94.77               | 7.76  | 12.88               | 9.04  | 0.22                | 6.40  | 31.25               | 11.18 | 0.78                | 6.84  | 0.22                | 15.25 | <QL                 |       | 0.69                | 2.76  | <QL                 |      |
| 17      | 75.24               | 4.85  | 10.26               | 8.31  | 0.18                | 9.21  | 60.31               | 3.01  | 0.93                | 4.84  | 0.34                | 12.88 | <QL                 |       | 0.76                | 17.60 | <QL                 |      |
| 18      | 13.67               | 4.65  | 6.63                | 4.88  | <QL                 |       | 121.78              | 7.04  | 0.64                | 14.32 | 0.65                | 14.33 | <QL                 |       | 0.79                | 8.31  | <QL                 |      |
| 19      | <QL                 |       | 4.59                | 12.94 | <QL                 |       | 12.46               | 4.02  | 0.87                | 4.20  | 1.76                | 4.18  | <QL                 |       | <QL                 |       | 0.38                | 5.41 |
| 19      | <QL                 |       | 3.67                | 2.59  | <QL                 |       | 10.65               | 9.96  | 0.95                | 9.60  | 2.20                | 0.61  | <QL                 |       | <QL                 |       | 0.47                | 3.03 |
| 20      | <QL                 |       | 4.48                | 10.45 | <QL                 |       | 49.93               | 7.82  | 0.88                | 10.75 | 2.27                | 1.87  | <QL                 |       | <QL                 |       | 0.47                | 1.39 |
| 20      | <QL                 |       | 3.64                | 2.82  | <QL                 |       | 18.66               | 0.70  | 0.95                | 7.13  | 2.48                | 4.83  | <QL                 |       | <QL                 |       | 0.52                | 2.37 |
| 21      | <QL                 |       | 7.63                | 9.11  | <QL                 |       | 5.43                | 8.41  | 0.61                | 7.53  | 0.70                | 8.28  | <QL                 |       | 0.59                | 4.51  | <QL                 |      |
| 22      | 8.97                | 7.09  | 8.43                | 10.73 | 0.10                | 10.99 | 26.31               | 12.42 | 0.79                | 6.18  | 0.37                | 10.08 | <QL                 |       | 0.58                | 9.67  | <QL                 |      |
| 23      | <QL                 |       | 7.72                | 2.54  | 0.11                | 8.02  | 3.73                | 9.54  | 0.73                | 12.07 | 0.65                | 16.09 | <QL                 |       | 0.64                | 32.60 | <QL                 |      |
| 24      | <QL                 |       | 7.84                | 0.06  | <QL                 |       | 2.47                | 23.82 | 0.62                | 12.83 | 0.58                | 2.89  | <QL                 |       | 0.81                | 23.29 | <QL                 |      |
| 25      | <QL                 |       | 7.60                | 6.21  | <QL                 |       | 8.90                | 6.29  | 0.62                | 12.84 | 0.55                | 9.85  | <QL                 |       | 0.66                | 15.47 | <QL                 |      |
| 26      | <QL                 |       | 6.80                | 5.66  | <QL                 |       | 21.95               | 3.17  | 0.71                | 16.64 | 0.81                | 2.39  | <QL                 |       | 0.67                | 5.97  | 0.14                | 1.52 |
| 27      | <QL                 |       | 5.53                | 0.99  | <QL                 |       | 5.65                | 7.77  | 0.90                | 0.72  | 1.33                | 2.64  | <QL                 |       | <QL                 |       | 0.24                | 3.39 |
| 28      | 16.02               | 10.34 | 9.20                | 8.64  | <QL                 |       | 27.90               | 7.17  | 0.65                | 6.01  | <QL                 |       | <QL                 |       | <QL                 |       | <QL                 |      |
| 30      | 12.50               | 4.92  | 2.92                | 2.34  | <QL                 |       | 3.96                | 7.50  | 0.40                | 1.87  | <QL                 |       | <QL                 |       | <QL                 |       | <QL                 |      |
| 31      | 22.20               | 5.44  | 10.21               | 3.76  | 0.12                | 13.49 | 37.38               | 4.41  | 0.60                | 9.64  | <QL                 |       | <QL                 |       | 0.51                | 9.96  | <QL                 |      |
| 32      | 25.04               | 19.91 | 3.05                | 23.24 | <QL                 |       | 34.93               | 18.76 | 1.54                | 22.12 | <QL                 |       | <QL                 |       | <QL                 |       | <QL                 |      |
| 33      | 37.16               | 4.53  | 9.33                | 2.52  | <QL                 |       | 27.43               | 5.62  | 0.46                | 13.68 | 0.27                | 20.85 | <QL                 |       | 1.00                | 2.97  | <QL                 |      |
| 34      | 81.32               | 3.52  | 9.04                | 1.74  | 0.14                | 15.09 | 48.15               | 3.57  | 0.69                | 17.39 | 0.19                | 22.79 | <QL                 |       | 0.77                | 0.80  | <QL                 |      |
| 35      | 128.94              | 9.22  | 10.26               | 11.97 | 0.18                | 4.11  | 18.52               | 12.82 | 0.87                | 7.53  | 0.20                | 12.92 | <QL                 |       | 0.78                | 6.41  | <QL                 |      |
